# Supplementary material
Source: PubMed Central journal article supplement (PMC1851835)

**Figure S1. Graphical representation of Seed Germination in T-DNA insertion mutants of GCR1, PRN1, and NF-Y subunits Hypersensitive to ABA.**

Graphical representation of germination rate per day for 600nM ABA as described in Figure 5. Each data point represents between three to six independent experimental replicates. Bars represent the standard error of the mean. The *prn1* data was done directly in the germination experiments with *gcr1* and the *nf-y-b* subunits and is placed on graphs **B.** and **C.** for comparison to the *nf-y-a* and *nf-y-c* mutant seed data.

**A. Seed germination assay data for *gcr1* mutants and the *nf-y-b* mutants compared to wild type and *prn1*.**

**B. Seed germination assay data for the *nf-y-a* mutants compared to wild type and *prn1*.**

**C. Seed germination assay data for the *nf-y-c* mutants compared to wild type and *prn1*.**

A

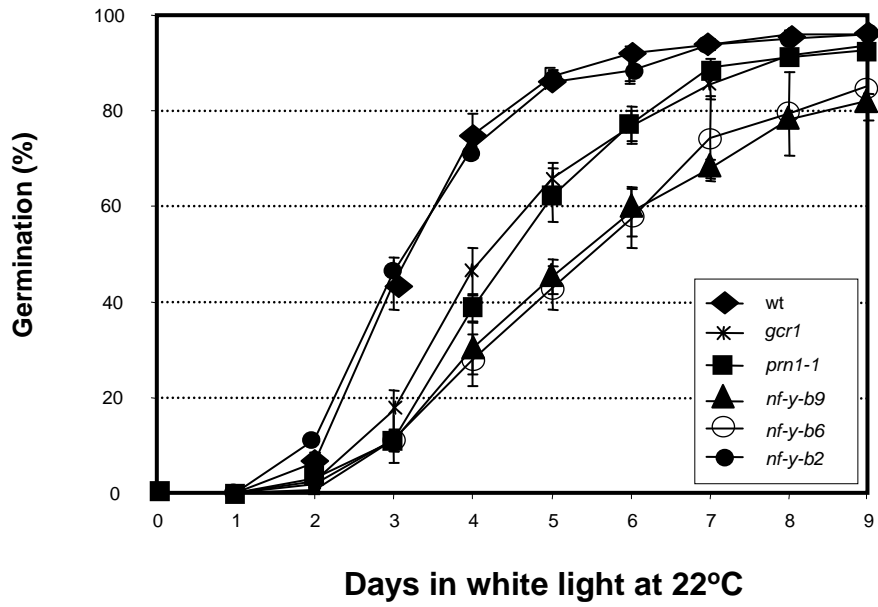

B

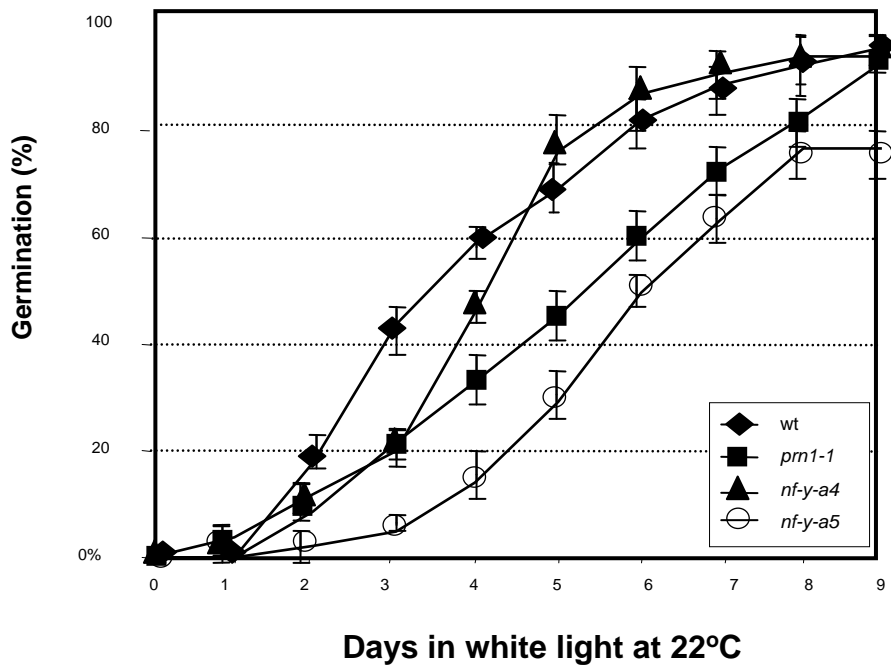

C

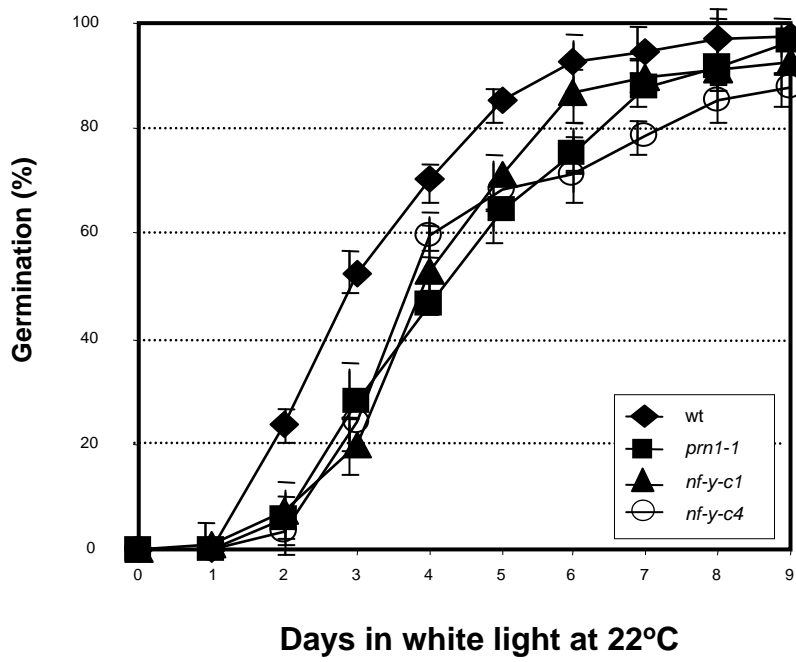

Supplement: plntphys_pp.106.089904_1.pdf [file plntphys_pp.106.089904_1.pdf]
