# Supplementary material
Source: PubMed Central journal article supplement (PMC1851835)
Supplement: plntphys_pp.106.089904_2.pdf [file plntphys_pp.106.089904_2.pdf]

## TABLES

Table S1. Tested accessions of null T-DNA insertion lines for potential BL-induced *Lhcb* signal transduction pathway components.

| Protein | Gene      | Accession   |
|---------|-----------|-------------|
| NF-Y-A1 | At5g12840 | SALK_047351 |
| NF-Y-A2 | At3g05690 | SALK_146170 |
| NF-Y-A3 | At1g72830 | SALK_067992 |
| NF-Y-A3 | At1g72830 | SALK_068206 |
| NF-Y-A4 | At2g34720 | SALK_003337 |
| NF-Y-A4 | At2g34720 | SALK_003338 |
| NF-Y-A5 | At1g54160 | SALK_006559 |
| NF-Y-A5 | At1g54160 | SALK_042760 |
| NF-Y-A6 | At3g14020 | SALK_028169 |
| NF-Y-A6 | At3g14020 | SALK_005942 |
| NF-Y-A7 | At1g30500 | SALK_020063 |
| NF-Y-A7 | At1g30500 | SALK_121158 |
| NF-Y-A9 | At3g20910 | SALK_002235 |
| NF-Y-B1 | At2g38880 | SALK_038840 |
| NF-Y-B1 | At2g38880 | SALK_109993 |
| NF-Y-B2 | At5g47640 | SALK_025666 |
| NF-Y-B2 | At5g47640 | SALK_105664 |
| NF-Y-B3 | At4g14540 | SALK_130295 |
| NF-Y-B3 | At4g14540 | SALK_130295 |
| NF-Y-B4 | At1g09030 | SALK_123845 |
| NF-Y-B6 | At5g47670 | SALK_118236 |
| NF-Y-B6 | At5g47670 | SALK_118238 |
| NF-Y-B7 | At2g13570 | SALK_085886 |
| NF-Y-B8 | At2g37060 | SALK_108199 |

|          |           |             |
|----------|-----------|-------------|
| NF-Y-B9  | At1g21970 | SALK_000450 |
| NF-Y-B9  | At1g21970 | SALK_021549 |
| NF-Y-C1  | At3g48590 | SALK_086334 |
| NF-Y-C4  | At5g63470 | SALK_032163 |
| GCR1     | At1g48270 | SALK_027808 |
| GCR1     | At1g48270 | CS6539      |
| GPA1     | At2g26300 | SALK_066823 |
| GPA1     | At2g26300 | SALK_001846 |
| GPA1-pro | At2g26300 | SALK_059035 |
| GPA1-pro | At2g26300 | SALK_571120 |
| PRN1     | At3g59220 | SALK_006939 |
| PRN1     | At3g59220 | Pir1-1      |
