# Supplementary material
Source: PubMed Central journal article supplement (PMC1851835)
Supplement: plntphys_pp.106.089904_3.pdf [file plntphys_pp.106.089904_3.pdf]

## SUPPLEMENTAL MATERIALS

**Table S1.** Accessions of null T-DNA insertion lines for potential BL-induced *Lhcb* signal transduction pathway components were tested for a variety of genes as described in Materials and Methods under Plant Material.

**Figure S1.** Graphical representation of the ABA hypersensitivity germination experiments is shown in this figure. Materials and methods are described under ABA hypersensitivity germination experiments.
